# Supplementary material for: Widespread employment of conserved C. elegans homeobox genes in neuronal identity specification
Source: bioRxiv preprint, doi:10.1101/2022.04.29.490095, version 2 (2022-05-19)
Supplement: Supp Table S3 [file 490095_file06.docx]

**Table S3: Cells and identity markers not affected by homeobox mutant**

| Gene | Neuron class | Marker tested |
| --- | --- | --- |
| *lin-11* | DVA | NeuroPAL unaffected in *lin-11* null |
| RIC, RIM | *tbh-1* & *tdc-1* reporter unaffected in *lin-11* null |
| *unc-30* | ASG | NeuroPAL unaffected |
| *unc-62* | SDQ | NeuroPAL unaffected (but: only hypomorphic *unc-62* tested) |
| DVA | NeuroPAL unaffected (but: only hypomorphic *unc-62* tested) |
| PDB | NeuroPAL unaffected (but: only hypomorphic *unc-62* tested) |
| SAB | NeuroPAL unaffected (but: only hypomorphic *unc-62* tested) |
| RIM | NeuroPAL and *eat-4* unaffected (but: only hypomorphic *unc-62* tested) |
| *unc-86* | RIP | *nlp-51* and *nlp-73* unaffected |
| *ceh-9* | ASJ, AWB, SAA, RIV | *cho-1* fosmid transgene and unc-17 reporter allele unaffected |
| ADF | *cho-1* fosmid transgene and unc-17 reporter allele unaffected |
| PQR | *eat-4* fosmid unaffected |
| *ceh-19* | ADF | *cho-1* and *tph-1* fosmid transgenes unaffected |
| PHA | NeuroPAL and *eat-4* unaffected |
| *vab-3* | ADA | NeuroPAL, *nlp-82* reporter allele unaffected |
| ASK | *srg-8* (*otIs733*) unaffected |
| *ceh-32* | I2 | *gur-3 (nIs780), eat-4prom8 (otIs558*) unaffected |
| M1 | *unc-17prom3* transgene (*otIs661*) unaffected |
| ADL | *ift-20 srh-127 hlh-4* unaffected |
| RIB | *sto-3, unc-47, unc-46, cho-1* unaffected |
| RID | *flp-2 (ynIs57)* unaffected |
| RMH | *flp-32* reporter allele (*syb4374*) unaffected |
| *ceh-45* | RIB | *unc-47* fosmid unaffected |
| *lim-4* | SIB | *rig-6* unaffected; *unc-17* reporter allele slight dimming |
| SIA | NeuroPAL; *unc-17* unaffected |
| SMD | NeuroPAL; *unc-17* unaffected |
| *vab-7* | ADA, PHC | NeuroPAL; *eat-4* unaffected |
| *vab-15* | PVC | *hdIs32[glr-1::DsRed2]; ynIs54[flp-20p::GFP]* unaffected |
| *ceh-54* | I2, M3, BAG, AFD, AWC, ASE, ASG | *eat-4* unaffected |
| *ceh-57* | ADF, ASI, ASJ | NeuroPAL, *ins-24* unaffected |
| *ceh-31* | SDQ | *lad-2, unc-17, cho-1* unaffected |
|  | URA, URB | *unc-17, cho-1* unaffected |
| *pros-1* | DVA | *unc-17(syb4491)* and *nlp-12 (otIs706)* unaffected |
| *ceh-14* | ADA | NeuroPAL and *eat-4* reporter allele unaffected |
